## Correction: $\beta$ 2-spectrin depletion impairs DNA damage repair

Nobuo Horikoshi<sup>1,2</sup>, Raj K. Pandita<sup>1,2</sup>, Kalpana Mujoo<sup>1</sup>, Shashank Hambarde<sup>1,3</sup>, Dharmendra Sharma<sup>1</sup>, Abid R. Mattoo<sup>1</sup>, Sharmistha Chakraborty<sup>1,2</sup>, Vijaya Charaka<sup>1</sup>, Clayton R. Hunt<sup>1,2</sup> and Tej K. Pandita<sup>1,2</sup>

<sup>1</sup>Department of Radiation Oncology, Houston Methodist Research Institute, Houston, TX, USA

<sup>2</sup>Department of Radiation Oncology, University of Texas Southwestern Medical School, Dallas, TX, USA

<sup>3</sup>Department of Microbiology and Molecular Genetics, McGovern Medical School, University of Texas Health Science Center at Houston, Houston, TX, USA

**Published:** April 24, 2026

**Copyright:** © 2026 Horikoshi et al. This is an open access article distributed under the terms of the [Creative Commons Attribution License](#) (CC BY 4.0), which permits unrestricted use, distribution, and reproduction in any medium, provided the original author and source are credited.

**This article has been corrected:** It was identified that a portion of Figure 6B was improperly placed, resulting in an overlap between two images (*Sptbn1*<sup>-/-</sup> and *Sptbn1*<sup>+/+</sup>) for new DNA replication forks in MEF cells without Hydroxyurea treatment. The authors provided a revised Figure 6B, replacing the image for *Sptbn1*<sup>-/-</sup> cells without Hydroxyurea treatment with the correct data from the original experiments. This correction does not alter the article's conclusions.

Original article: Oncotarget. 2016; 7:33557–33570. <https://doi.org/10.18632/oncotarget.9677>

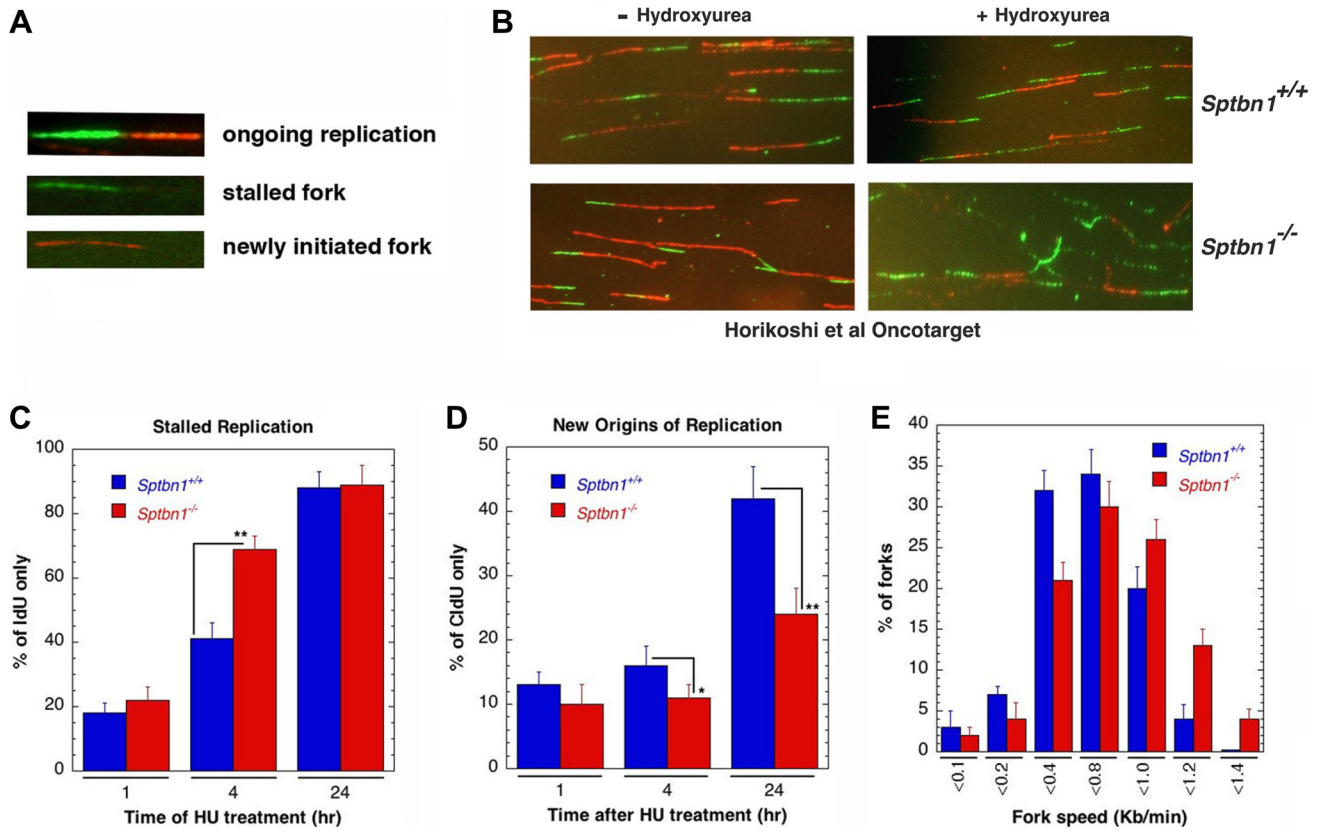

**Figure 6: *Sptbn1*<sup>-/-</sup> MEFs exhibit defective stalled DNA replication fork resolution and new origins of replication.** (A, B) Initiation of new DNA replication forks and reinitiation of stalled DNA replication forks in *Sptbn1*<sup>-/-</sup> and *Sptbn1*<sup>+/+</sup> MEFs. Cells were pre-labeled with 5-iododeoxyuridine (IdU), treated with hydroxyurea (HU) for the indicated intervals, and then rinsed to remove HU followed by post labeling with 5-chlorodeoxyuridine (CldU) (upper panel) as described previously [66]. The cells were fixed and immunostained with IdU (green) and CldU (red) antibodies. (A) Three major types of labeled DNA tracts for analysis are shown. (B) *Sptbn1*<sup>+/+</sup> and *Sptbn1*<sup>-/-</sup> MEFs with and without treatment of hydroxyurea. (C) Percentages of stalled DNA replication forks (IdU only signals) in *Sptbn1*<sup>-/-</sup> and *Sptbn1*<sup>+/+</sup> cells after HU treatment. (D) New origins (CldU signals) in *Sptbn1*<sup>-/-</sup> and *Sptbn1*<sup>+/+</sup> cells. (E) Percentage of forks with fork speed in *Sptbn1*<sup>-/-</sup> and *Sptbn1*<sup>+/+</sup> MEFs. Means  $\pm$  standard deviations of 3 independent experiments are shown in. \* $p < 0.05$ ; \*\* $p < 0.01$ , Student *t*-test.
